# Supplementary material for: Low-dimensional lateral heterojunctions made of hexagonal boron nitride and carbon materials as efficient electrocatalysts for the chlorine evolution reaction: a study of DFT and machine learning
Source: Royal Society of Chemistry journal article supplement (doi:10.1039/d3ta06894c), 2024-01-01
Supplement: d3ta06894c1.pdf [file d3ta06894c1.pdf]

## *Supporting Information*

**Low-dimensional lateral heterojunctions made of hexagonal boron  
nitride and carbon materials as efficient electrocatalysts for chlorine  
evolution reaction: A study of DFT and machine learning**

Jiake Fan, Lei Yang, Weihua Zhu\*

*Institute for Computation in Molecular and Materials Science, School of Chemistry  
and Chemical Engineering, Nanjing University of Science and Technology, Nanjing  
210094, China*

---

\* Corresponding author. E-mail: zhuwh@njust.edu.cn

Table S1. The hyperparameters search space and the optimal hyperparameters of RFR

| Hyperparameters | Search space       | Optimal hyperparameters |
|-----------------|--------------------|-------------------------|
| n_estimators    | (50,1000, step=50) | 450                     |
| max_depth       | (2, 18, step=2)    | 8                       |

Table S2. The hyperparameters search space and the optimal hyperparameters of XGBR

| Hyperparameters  | Search space         | Optimal hyperparameters |
|------------------|----------------------|-------------------------|
| n_estimators     | (40, 100, step=10)   | 100                     |
| max_depth        | (3, 15, step=1)      | 13                      |
| min_child_weight | (5, 10, step=1)      | 5                       |
| colsample_bytree | (0.4, 1, step=0.1)   | 0.9                     |
| subsample        | (0.4, 1, step=0.1)   | 0.9                     |
| reg_alpha        | (0.1, 0.5, step=0.1) | 0.1                     |
| reg_lambda       | (0.5, 0.9, step=0.1) | 0.7                     |
| gamma            | (0, 1, step=1)       | 0                       |

Table S3. The interaction energy between graphene and h-BN in lateral heterojunctions

| Dimensional | Total energy/eV | The energy of h-BN/eV | The energy of graphene/eV | Interaction energy/eV |
|-------------|-----------------|-----------------------|---------------------------|-----------------------|
| 2           | -33918.71665    | -17317.97715          | -16558.84154              | -41.898               |
| 1           | -63594.75111    | -32492.86308          | -31069.31618              | -32.5719              |
| 0           | -63479.5114     | -30283.07519          | -33098.76588              | -97.6703              |

Table S4. Three groups of features

| Group name | Features    |
|------------|-------------|
| Dimension  | B fraction, |

|                         |                                                                                                                                                                                                                                                                                                                                                                                                                                                                                                                                                                                                                                                                                                                                             |
|-------------------------|---------------------------------------------------------------------------------------------------------------------------------------------------------------------------------------------------------------------------------------------------------------------------------------------------------------------------------------------------------------------------------------------------------------------------------------------------------------------------------------------------------------------------------------------------------------------------------------------------------------------------------------------------------------------------------------------------------------------------------------------|
|                         | <p>C fraction,</p> <p>N fraction,</p> <p>sine coulomb matrix eig 4,</p> <p>sine coulomb matrix eig 5,</p> <p>sine coulomb matrix eig 7,</p> <p>sine coulomb matrix eig 8,</p> <p>sine coulomb matrix eig 9,</p> <p>sine coulomb matrix eig 10,</p> <p>sine coulomb matrix eig 11,</p> <p>sine coulomb matrix eig 12,</p> <p>sine coulomb matrix eig 13,</p> <p>sine coulomb matrix eig 14,</p> <p>sine coulomb matrix eig 15,</p> <p>sine coulomb matrix eig 18,</p> <p>sine coulomb matrix eig 19,</p> <p>sine coulomb matrix eig 20,</p> <p>sine coulomb matrix eig 21,</p> <p>sine coulomb matrix eig 22,</p> <p>sine coulomb matrix eig 23,</p> <p>sine coulomb matrix eig 24,</p> <p>sine coulomb matrix eig 25,</p> <p>Dimensions</p> |
| <p>Cl Concentration</p> | <p>Cl fraction,</p> <p>mean AtomicWeight,</p> <p>mean Column,</p> <p>mean Row,</p>                                                                                                                                                                                                                                                                                                                                                                                                                                                                                                                                                                                                                                                          |

|              |                                                                                                                                                                                                                                                                                                                                                                                                                                                                                             |
|--------------|---------------------------------------------------------------------------------------------------------------------------------------------------------------------------------------------------------------------------------------------------------------------------------------------------------------------------------------------------------------------------------------------------------------------------------------------------------------------------------------------|
|              | <p>mean Number,</p> <p>mean AtomicRadius,</p> <p>mean Electronegativity,</p> <p>avg p valence electrons,</p> <p>frac s valence electrons,</p> <p>frac p valence electrons,</p> <p>sine coulomb matrix eig 0,</p> <p>sine coulomb matrix eig 1,</p> <p>sine coulomb matrix eig 2,</p> <p>sine coulomb matrix eig 3,</p> <p>sine coulomb matrix eig 6,</p> <p>sine coulomb matrix eig 32</p>                                                                                                  |
| <p>Other</p> | <p>sine coulomb matrix eig 29</p> <p>sine coulomb matrix eig 30</p> <p>sine coulomb matrix eig 17</p> <p>sine coulomb matrix eig 45</p> <p>sine coulomb matrix eig 26</p> <p>sine coulomb matrix eig 27</p> <p>sine coulomb matrix eig 43</p> <p>sine coulomb matrix eig 40</p> <p>sine coulomb matrix eig 38</p> <p>sine coulomb matrix eig 53</p> <p>sine coulomb matrix eig 44</p> <p>sine coulomb matrix eig 39</p> <p>sine coulomb matrix eig 46</p> <p>sine coulomb matrix eig 37</p> |

sine coulomb matrix eig 58

sine coulomb matrix eig 34

sine coulomb matrix eig 54

sine coulomb matrix eig 35

sine coulomb matrix eig 48

sine coulomb matrix eig 57

sine coulomb matrix eig 49

sine coulomb matrix eig 47

sine coulomb matrix eig 59

sine coulomb matrix eig 56

sine coulomb matrix eig 31

sine coulomb matrix eig 52

sine coulomb matrix eig 36

sine coulomb matrix eig 55

sine coulomb matrix eig 51

sine coulomb matrix eig 41

sine coulomb matrix eig 60

sine coulomb matrix eig 16

sine coulomb matrix eig 33

sine coulomb matrix eig 50

sine coulomb matrix eig 42

sine coulomb matrix eig 28

sine coulomb matrix eig 61

sine coulomb matrix eig 62

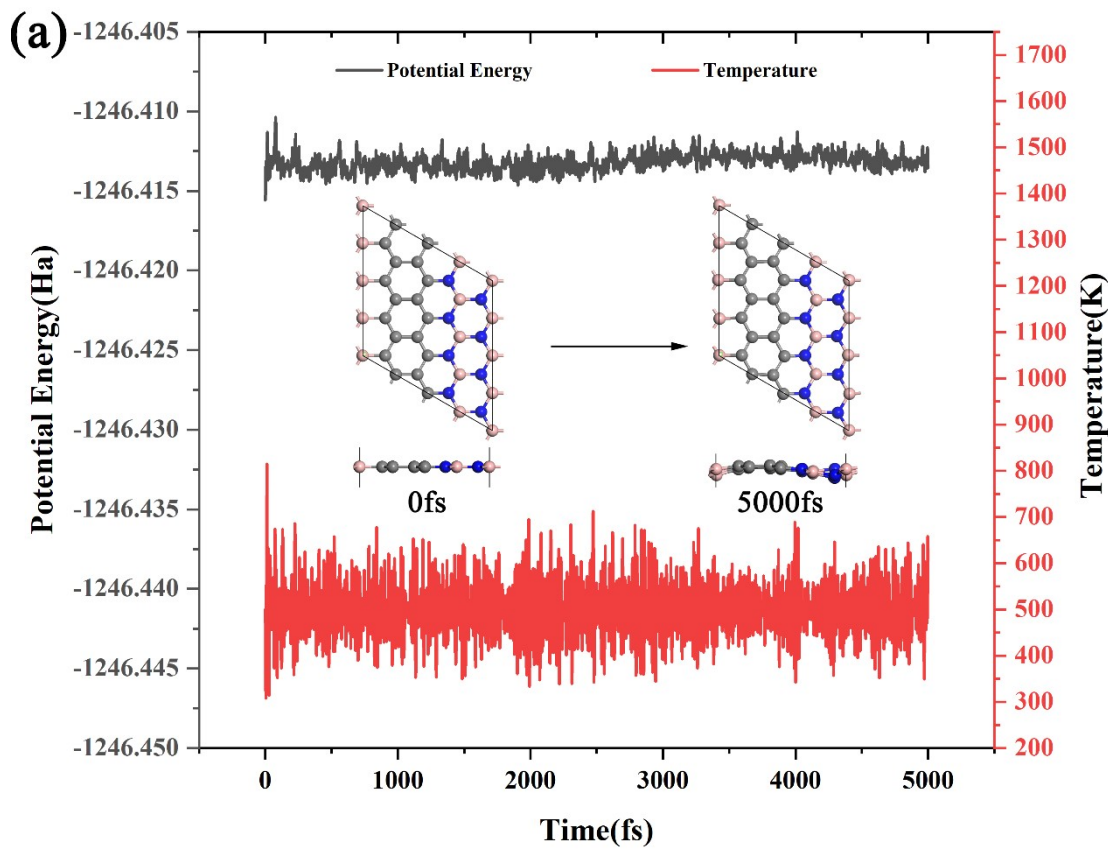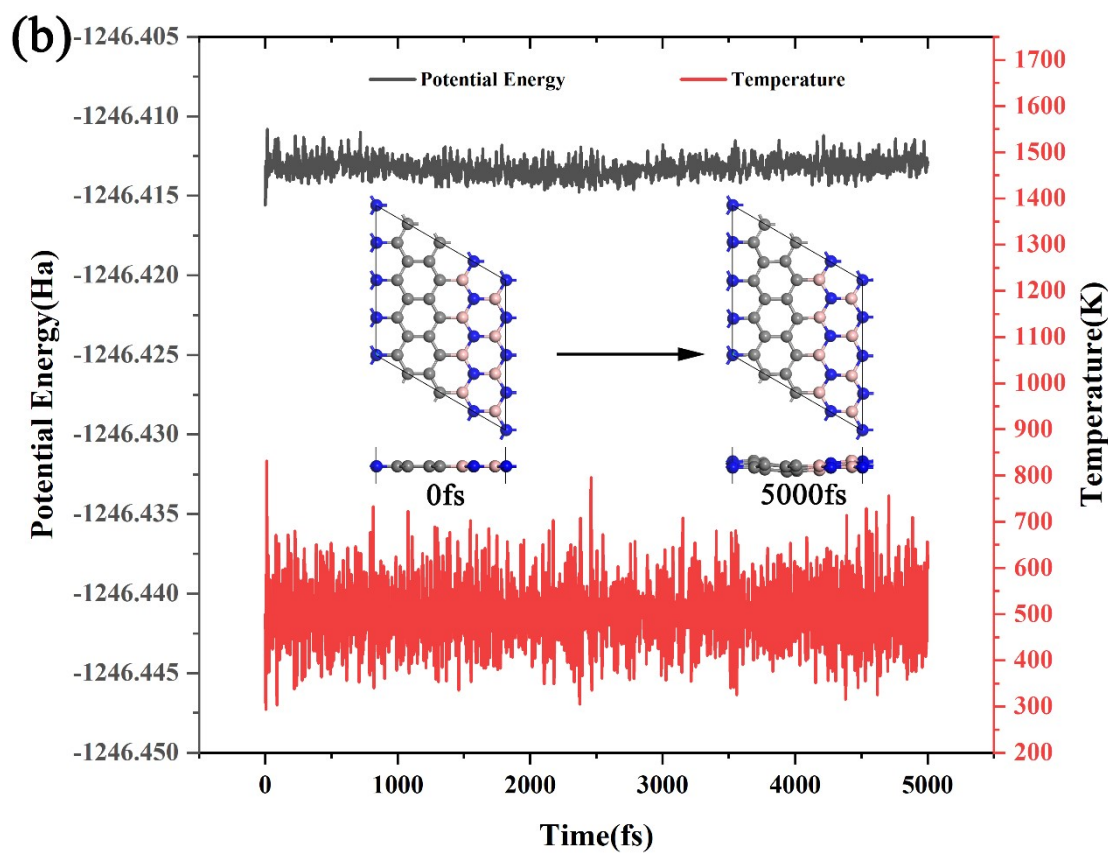

Figure S1. The Potential energy, temperature profiles and corresponding snapshots of G1 (a)

and G2 (b) based on AIMD

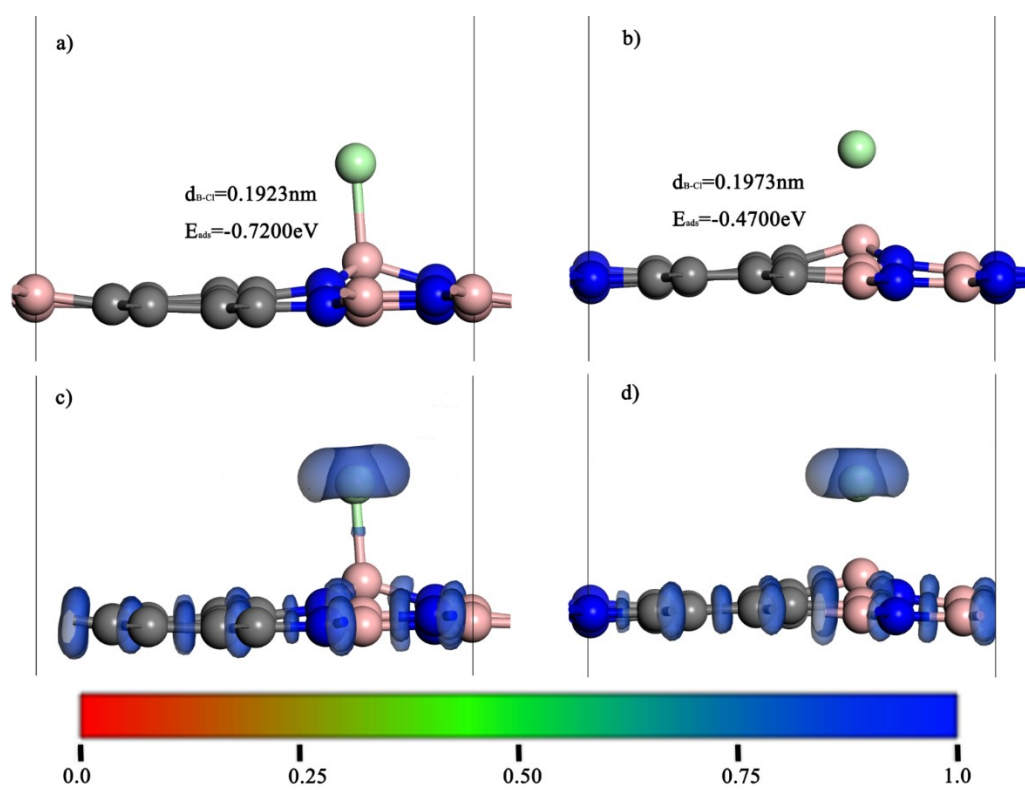

Figure S2. Length of  $d_{B-Cl}$  and binding energy of  $Cl^-$  adsorbed on G1 (a) and G2 (b), and electron localization function of G1 (c) and G2 (d).

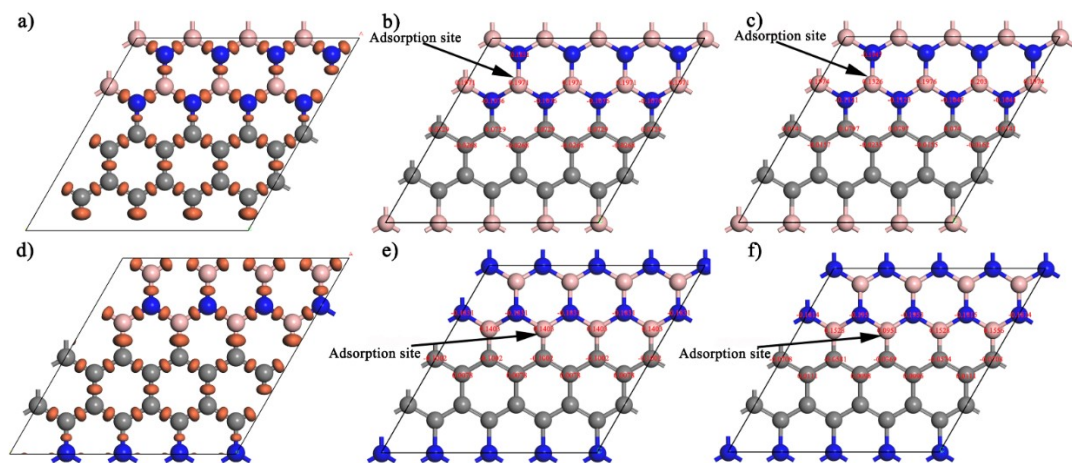

Figure S3. Electron localization function of G1 (a) and Hirshfeld charges of the atoms at the G1 interface before (b) and after (c) Cl<sup>-</sup> adsorption. Electron localization function of G2 (d) and Hirshfeld charges of the atoms at the G2 interface before (e) and after (f) Cl<sup>-</sup> adsorption.



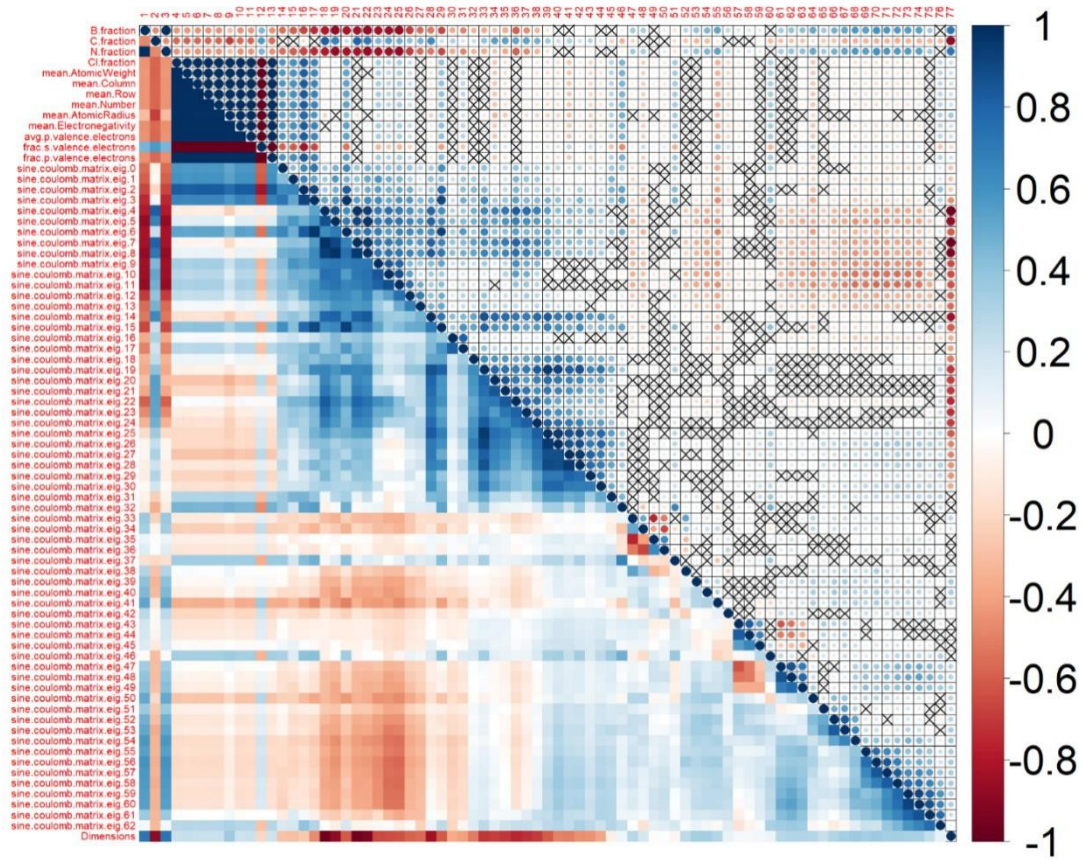

(a)

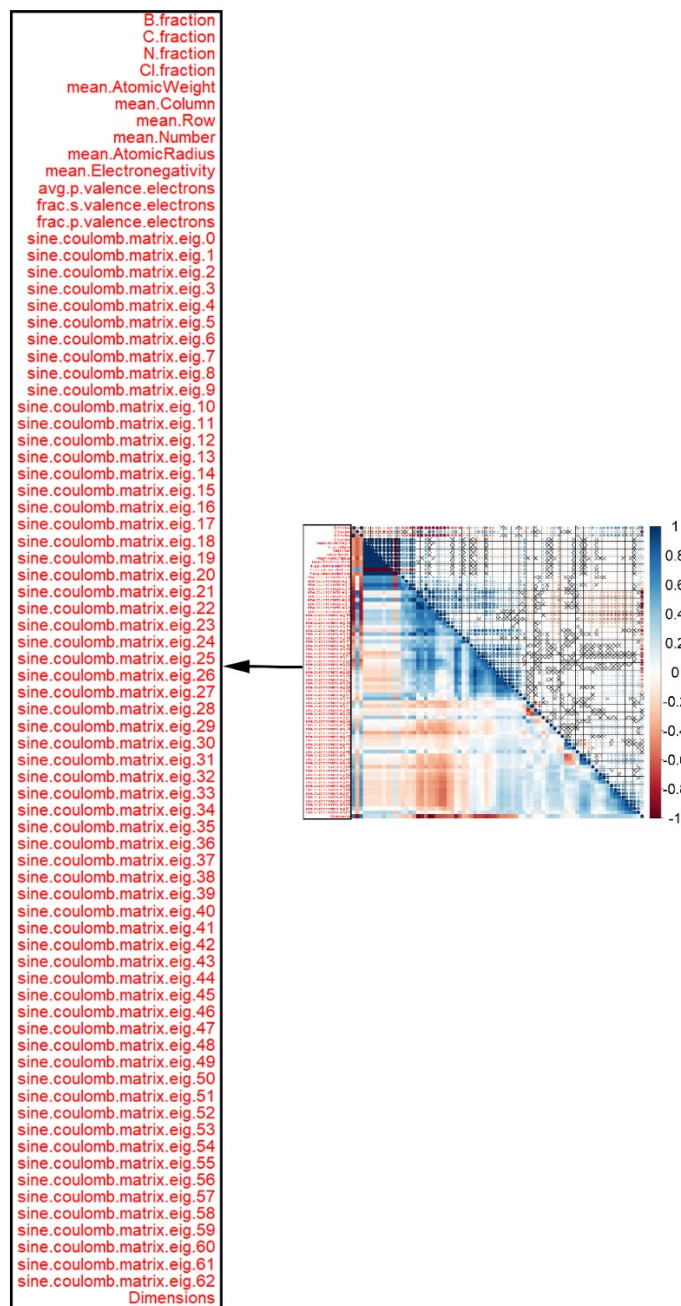

(b)

Figure S4. The heatmap of Pearson correlation coefficient and corresponding p-value between 77 features (the “x” in the grid indicates that there is no-significant-difference between two features; the larger the diameter of the circle and the darker the color, the greater the correlation between the two features) (a). The partial enlargement of the 77 feature labels(b).

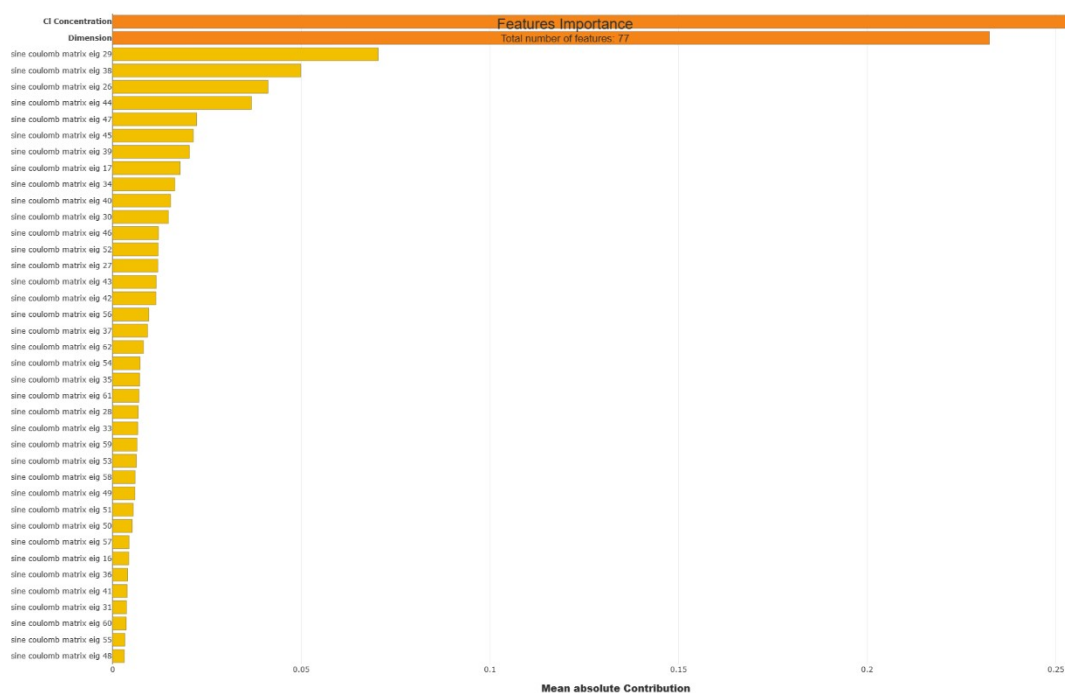

Figure S5. The SHAP feature importance calculated by the algorithm of RFR

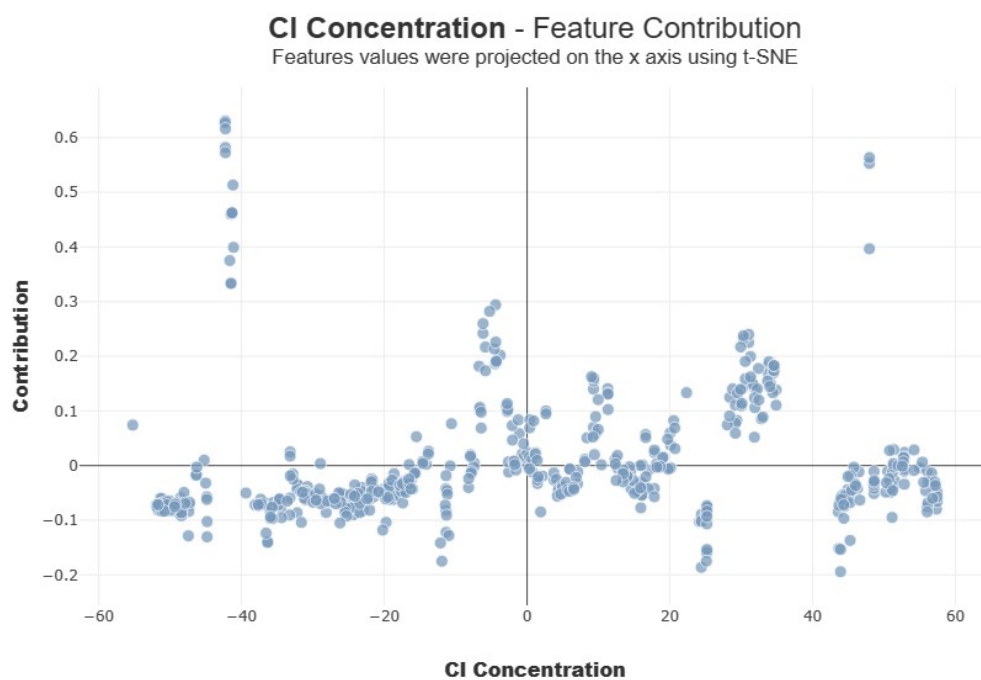

Figure S6. The  $c_{CI}$ 's contribution to the  $\Delta G_{CER}$  under the algorithm of RFR

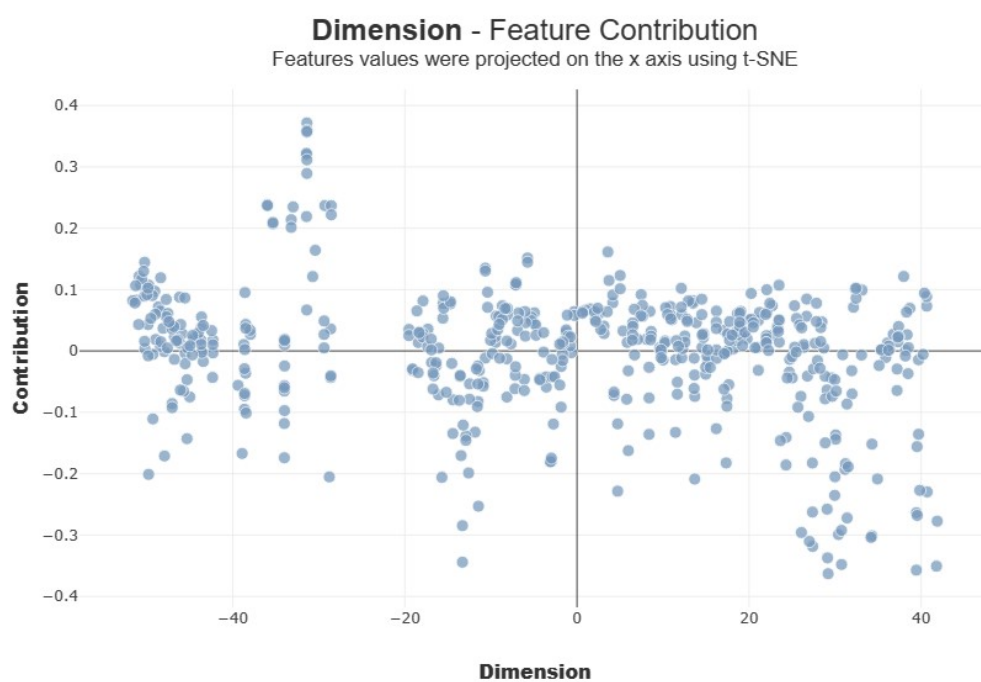

Figure S7. The contribution of heterojunction dimensions to the  $\Delta G_{\text{CER}}$  under the algorithm of RFR

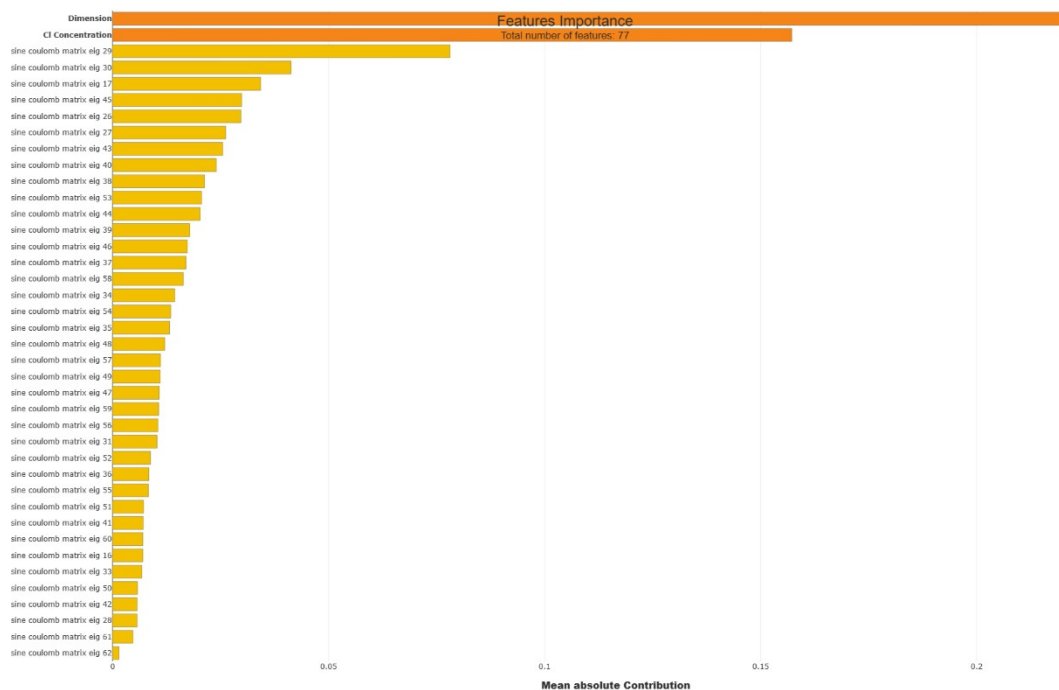

Figure S8. The SHAP feature importance under the algorithm XGBR

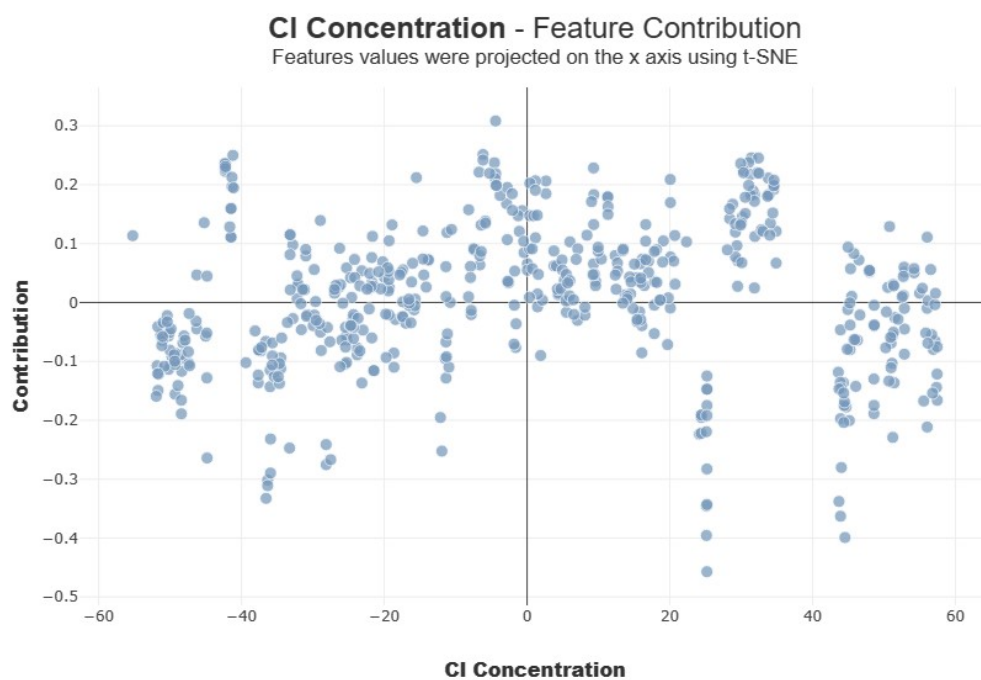

Figure S9. The  $c_{CI}$ 's contribution to the  $\Delta G_{CER}$  under the algorithm of XGBR

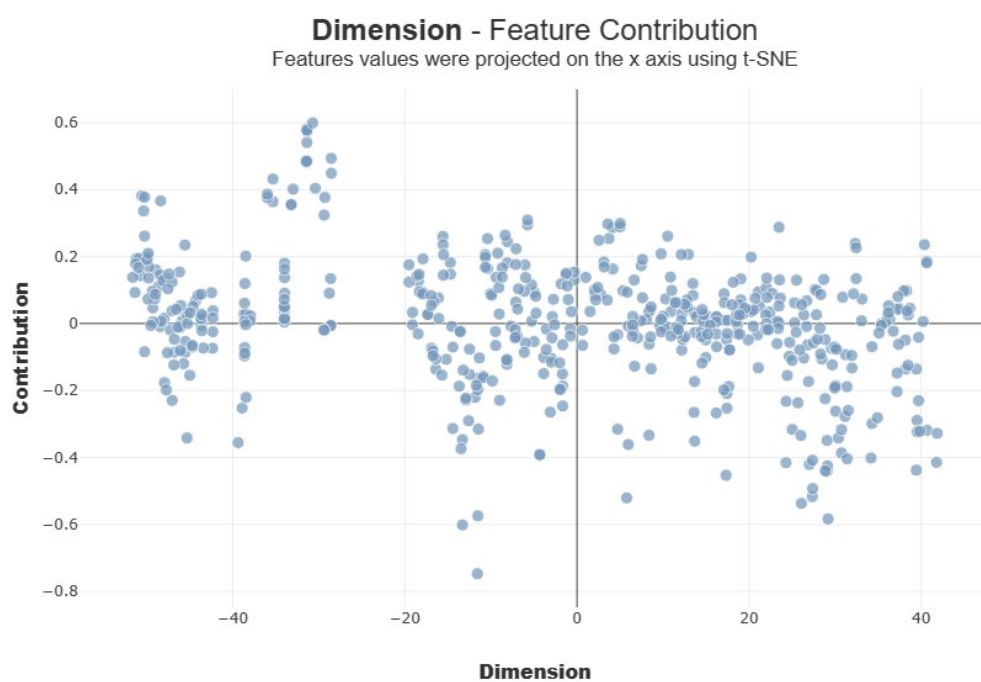

Figure S10. The contribution of heterojunction dimensions to the  $\Delta G_{\text{CER}}$  under the algorithm of XGBR



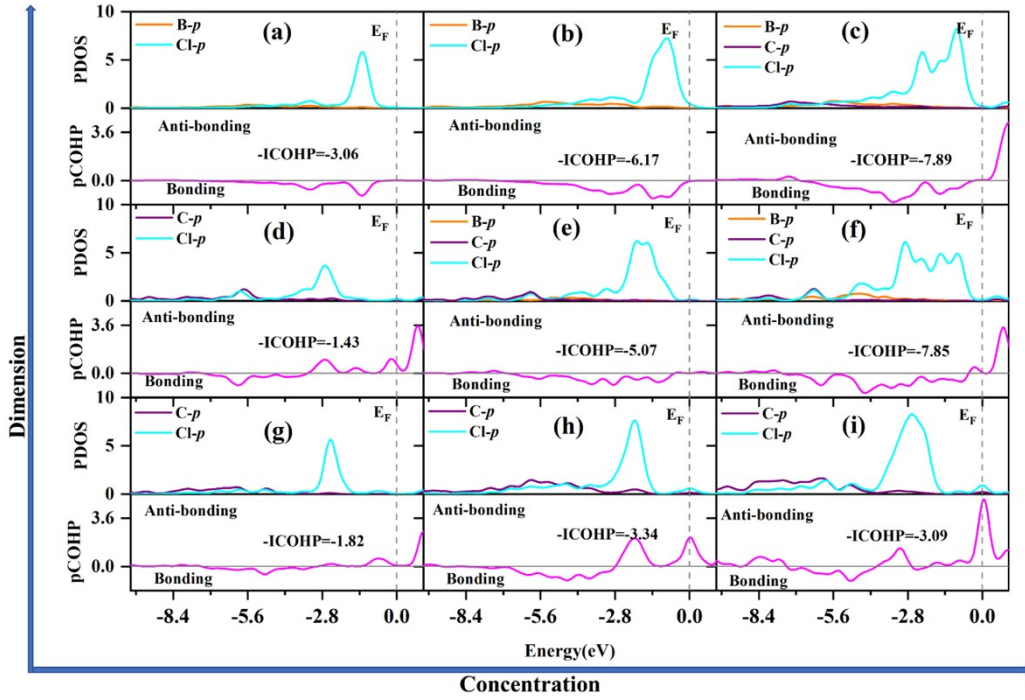

Figure S11. Partial density of states and projected crystal orbital Hamilton population (pCOHP) of the adsorption sites and Cl atoms under different surface coverage concentrations of Cl<sup>-</sup> ( $c_{Cl}$ ) and different heterojunction's dimensions (D) ((a)  $D=2$ ,  $c_{Cl}=1$ ; (b)  $D=2$ ,  $c_{Cl}=2$ ; (c)  $D=2$ ,  $c_{Cl}=3$ ; (d)  $D=1$ ,  $c_{Cl}=1$ ; (e)  $D=1$ ,  $c_{Cl}=2$ ; (f)  $D=1$ ,  $c_{Cl}=3$ ; (g)  $D=0$ ,  $c_{Cl}=1$ ; (h)  $D=0$ ,  $c_{Cl}=2$ ; (i)  $D=0$ ,  $c_{Cl}=3$ ).

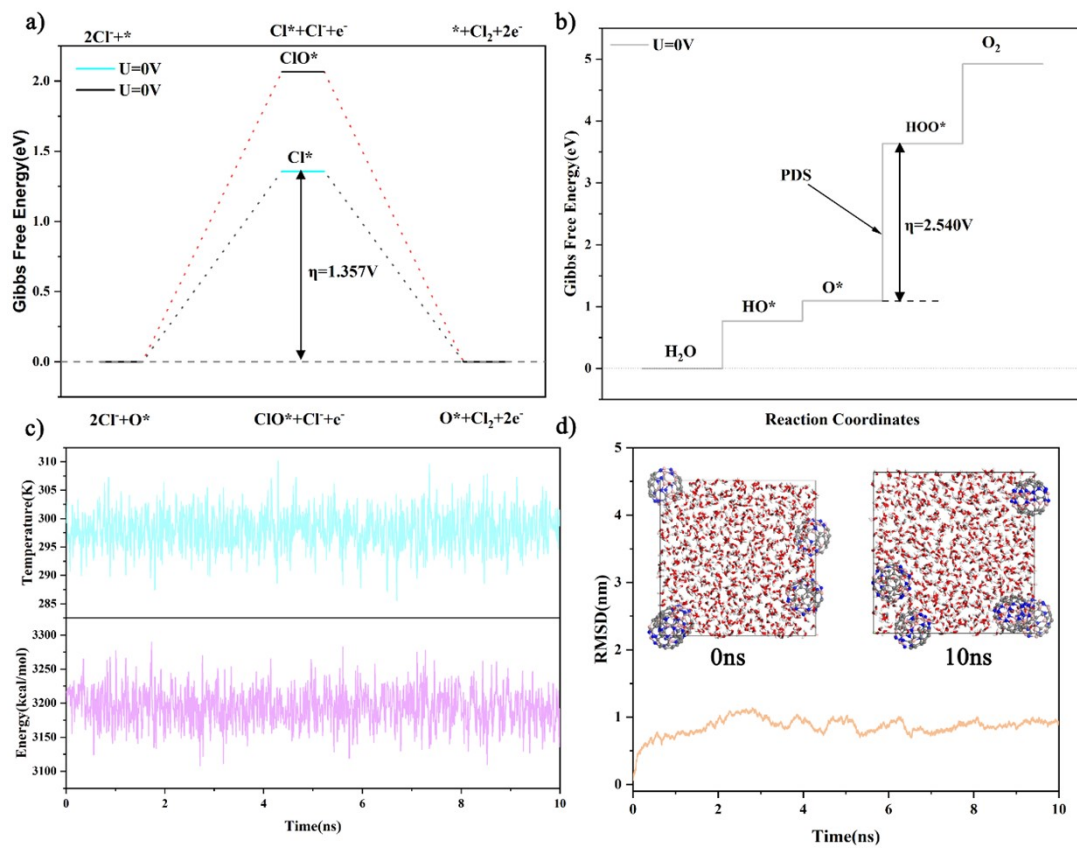

Figure S12. Gibbs free energy diagram of CER on the  $\text{D}_0\text{-Cl}_5\text{-Cl}_1\text{-Cl}_2$  (a) and OER on  $\text{D}_0\text{-Cl}_5\text{-Cl}_1\text{-Cl}_2$  (b) systems. Energy and temperature diagram (c) and root-mean-square deviation (RMSD) for zero-dimensional heterojunction in water and snapshots from molecular dynamics simulations (d).
